# Supplementary material
Source: publisher figshare collection journal article supplement (https://gsapubs.figshare.com/ndownloader/files/25960493)
Supplement: Supplementary file 1 [file 25960493]

## Sheet: Age models
Sample information		Stratigraphy		Duration relative to OAE 1a onset (kyr)		Sedimentation rates (cm/kyr)		Age models (Ma)
sample ID	meterage	lithostratigraphic horizon	Ap-CIS	calculated according to Beil et al. (2020)	calculated according to Malinverno et al. (2010) and Ghiradi et al. (2014)	calculated according to Beil et al. (2020)	calculated according to Malinverno et al. (2010) and Ghiradi et al. (2014)	Age model I (Ma) (Ba/Ap boundary at 126.3 Ma)	Age model II (Ba/Ap boundary at 123.8 Ma)	Age model III (Ba/Ap boundary at 121.8 Ma)
AH D0	0
AH D0.3	0.3
AH D0.6	0.6
AH D0.9	0.9
AH D1.5	1.5
AH D1.8	1.8
AH D2.1	2.1
AH D2.4	2.4
AH D2.7	2.7
AH D3.1	3.1
AH D3.4	3.4
AH D3.7	3.7
AH D4	4
AH D4.3	4.3
AH D4.9	4.9
AH D5.2	5.2
AH D6	6
AH D6.7	6.7
AH D9.6	9.6
AH D10	10
AH D10.5	10.5
AH D11	11
AH D11.3	11.3
AH D11.9	11.9
AH D12.5	12.5
AH D13.1	13.1
AH D13.4	13.4
AH D16	16
AH D16.5	16.5
AH D16.6	16.6		base Ap3	0	0	10.6912	215.814	125.4	122.9	120.9
AH D16.8	16.8			1.87069	0.0926724	10.6912	215.814	125.398	122.898	120.898
AH D26	26			87.9224	4.3556	10.6912	215.814	125.312	122.812	120.812
AH D26.3	26.3			90.7284	4.49461	10.6912	215.814	125.309	122.809	120.809
AH D26.6	26.6			93.5345	4.63362	10.6912	215.814	125.306	122.806	120.806
AH D27	27			97.2759	4.81897	10.6912	215.814	125.303	122.803	120.803
AH D27.5	27.5			101.953	5.05065	10.6912	215.814	125.298	122.798	120.798
AH D27.8	27.8			104.759	5.18966	10.6912	215.814	125.295	122.795	120.795
	33.5	base Rondon Member		158.073	7.83082	10.6912	215.814	125.242	122.742	120.742
AH D34.6	34.6			168.362	8.34052	10.6912	215.814	125.232	122.732	120.732
AH D34.9	34.9			171.168	8.47953	10.6912	215.814	125.229	122.729	120.729
AH D35.1	35.1			173.039	8.5722	10.6912	215.814	125.227	122.727	120.727
AH D35.4	35.4			175.845	8.71121	10.6912	215.814	125.224	122.724	120.724
AH D35.7	35.7			178.651	8.85022	10.6912	215.814	125.221	122.721	120.721
AH D36	36			181.457	8.98922	10.6912	215.814	125.219	122.719	120.719
AH D36.3	36.3			184.263	9.12823	10.6912	215.814	125.216	122.716	120.716
AH D36.6	36.6			187.069	9.26724	10.6912	215.814	125.213	122.713	120.713
AH D36.9	36.9			189.875	9.40625	10.6912	215.814	125.21	122.71	120.71
AH D37.2	37.2			192.681	9.54526	10.6912	215.814	125.207	122.707	120.707
AH D37.4	37.4			194.552	9.63793	10.6912	215.814	125.205	122.705	120.705
AH D37.5	37.5			195.487	9.68427	10.6912	215.814	125.205	122.705	120.705
AH D46.7	46.7			281.539	13.9472	10.6912	215.814	125.118	122.618	120.618
AH D47	47			284.345	14.0862	10.6912	215.814	125.116	122.616	120.616
AH D52.1	52.1			332.047	16.4494	10.6912	215.814	125.068	122.568	120.568
AH D52.4	52.4			334.853	16.5884	10.6912	215.814	125.065	122.565	120.565
AH D52.9	52.9			339.53	16.82	10.6912	215.814	125.06	122.56	120.56
AH D54	54			349.819	17.3297	10.6912	215.814	125.05	122.55	120.55
AH D54.3	54.3			352.625	17.4687	10.6912	215.814	125.047	122.547	120.547
AH D54.6	54.6			355.431	17.6078	10.6912	215.814	125.045	122.545	120.545
AH D54.9	54.9			358.237	17.7468	10.6912	215.814	125.042	122.542	120.542
AH D55.4	55.4			362.914	17.9784	10.6912	215.814	125.037	122.537	120.537
AH D55.8	55.8			366.655	18.1638	10.6912	215.814	125.033	122.533	120.533
AH D56.1	56.1			369.461	18.3028	10.6912	215.814	125.031	122.531	120.531
AH D56.8	56.8			376.009	18.6272	10.6912	215.814	125.024	122.524	120.524
AH D57.1	57.1			378.815	18.7662	10.6912	215.814	125.021	122.521	120.521
AH D57.4	57.4			381.621	18.9052	10.6912	215.814	125.018	122.518	120.518
AH D57.7	57.7			384.427	19.0442	10.6912	215.814	125.016	122.516	120.516
AH D59.5	59.5			401.263	19.8782	10.6912	215.814	124.999	122.499	120.499
AH D60.5	60.5			410.616	20.3416	10.6912	215.814	124.989	122.489	120.489
AH D61	61			415.293	20.5733	10.6912	215.814	124.985	122.485	120.485
AH D62	62			424.647	21.0366	10.6912	215.814	124.975	122.475	120.475
AH D63	63		base Ap4	434	21.5	2.83505	4.60251	124.966	122.466	120.466
AH D64	64			469.273	43.2273	2.83505	4.60251	124.931	122.431	120.431
AH D64.5	64.5			486.909	54.0909	2.83505	4.60251	124.913	122.413	120.413
AH D65	65			504.545	64.9545	2.83505	4.60251	124.895	122.395	120.395
Ah D65.5	65.5			522.182	75.8182	2.83505	4.60251	124.878	122.378	120.378
	67	base Walker Island Member		575.091	108.409	2.83505	4.60251	124.825	122.325	120.325
Ah D74	74		base Ap5	822	260.5	6.04982	3.33333	124.578	122.078	120.078
AH D74.3	74.3			826.959	269.5	6.04982	3.33333	124.573	122.073	120.073
AH D74.8	74.8			835.224	284.5	6.04982	3.33333	124.565	122.065	120.065
AH D75.5	75.5			846.794	305.5	6.04982	3.33333	124.553	122.053	120.053
AH D75.8	75.8			851.753	314.5	6.04982	3.33333	124.548	122.048	120.048
AH D76.4	76.4			861.671	332.5	6.04982	3.33333	124.538	122.038	120.038
AH D77.5	77.5			879.853	365.5	6.04982	3.33333	124.52	122.02	120.02
AH D78.2	78.2			891.424	386.5	6.04982	3.33333	124.509	122.009	120.009
AH D81	81			937.706	470.5	6.04982	3.33333	124.462	121.962	119.962
AH D81.7	81.7			949.276	491.5	6.04982	3.33333	124.451	121.951	119.951
AH D82.3	82.3			959.194	509.5	6.04982	3.33333	124.441	121.941	119.941
AH D83.5	83.5			979.029	545.5	6.04982	3.33333	124.421	121.921	119.921
AH D84.9	84.9			1002.17	587.5	6.04982	3.33333	124.398	121.898	119.898
AH D86	86			1020.35	620.5	6.04982	3.33333	124.38	121.88	119.88
AH D86.2	86.2			1023.66	626.5	6.04982	3.33333	124.376	121.876	119.876
AH D86.5	86.5			1028.62	635.5	6.04982	3.33333	124.371	121.871	119.871
AH D87.7	87.7			1048.45	671.5	6.04982	3.33333	124.352	121.852	119.852
AH D88.5	88.5			1061.68	695.5	6.04982	3.33333	124.338	121.838	119.838
AH D89.7	89.7			1081.51	731.5	6.04982	3.33333	124.318	121.818	119.818
AH D90.1	90.1			1088.12	743.5	6.04982	3.33333	124.312	121.812	119.812
AH D91	91		base Ap6	1103	770.5	3.5873	3.23782	124.297	121.797	119.797
AH D96.8	96.8			1264.68	949.633	3.5873	3.23782	124.135	121.635	119.635
Ah D98	98			1298.13	986.695	3.5873	3.23782	124.102	121.602	119.602
AH D98.3	98.3			1306.5	995.96	3.5873	3.23782	124.094	121.594	119.594
AH D98.7	98.7			1317.65	1008.31	3.5873	3.23782	124.082	121.582	119.582
AH D99.1	99.1			1328.8	1020.67	3.5873	3.23782	124.071	121.571	119.571
AH D99.6	99.6			1342.73	1036.11	3.5873	3.23782	124.057	121.557	119.557
AH D100	100			1353.88	1048.46	3.5873	3.23782	124.046	121.546	119.546
AH D101.7	101.7			1401.27	1100.97	3.5873	3.23782	123.999	121.499	119.499
AH D102	102			1409.64	1110.23	3.5873	3.23782	123.99	121.49	119.49
AH D102.3	102.3		base Ap7	1418	1119.5	4.71388	4.14465	123.982	121.482	119.482
AH D102.7	102.7			1426.49	1129.15	4.71388	4.14465	123.974	121.474	119.474
AH D110.4	110.4			1589.83	1314.93	4.71388	4.14465	123.81	121.31	119.31
AH D114	114			1666.2	1401.79	4.71388	4.14465	123.734	121.234	119.234
AH D115	115			1687.42	1425.92	4.71388	4.14465	123.713	121.213	119.213
AH D115.5	115.5			1698.02	1437.98	4.71388	4.14465	123.702	121.202	119.202
AH D117.5	117.5			1740.45	1486.24	4.71388	4.14465	123.66	121.16	119.16
AH D122.6	122.6			1848.64	1609.29	4.71388	4.14465	123.551	121.051	119.051
AH D123.1	123.1			1859.25	1621.35	4.71388	4.14465	123.541	121.041	119.041
AH D123.7	123.7			1871.98	1635.83	4.71388	4.14465	123.528	121.028	119.028
AH D124	124			1878.34	1643.07	4.71388	4.14465	123.522	121.022	119.022
AH D128	128			1963.2	1739.58	4.71388	4.14465	123.437	120.937	118.937
AH D130.4	130.4			2014.11	1797.48	4.71388	4.14465	123.386	120.886	118.886
AH D147.5	147.5			2376.87	2210.06	4.71388	4.14465	123.023	120.523	118.523
AH D147.8	147.8			2383.24	2217.3	4.71388	4.14465	123.017	120.517	118.517
AH D148	148			2387.48	2222.13	4.71388	4.14465	123.013	120.513	118.513
AH D148.5	148.5			2398.08	2234.19	4.71388	4.14465	123.002	120.502	118.502
AH D149	149			2408.69	2246.25	4.71388	4.14465	122.991	120.491	118.491
AH D149.0-2	149			2408.69	2246.25	4.71388	4.14465	122.991	120.491	118.491
AH D149.4	149.4			2417.18	2255.9	4.71388	4.14465	122.983	120.483	118.483
AH D149.5	149.5			2419.3	2258.32	4.71388	4.14465	122.981	120.481	118.481
AH D149.6	149.6			2421.42	2260.73	4.71388	4.14465	122.979	120.479	118.479
AH D149.9	149.9			2427.78	2267.97	4.71388	4.14465	122.972	120.472	118.472
AH D151	151			2451.12	2294.51	4.71388	4.14465	122.949	120.449	118.449
AH D152	152			2472.33	2318.64	4.71388	4.14465	122.928	120.428	118.428
AH D152.8	152.8			2489.31	2337.94	4.71388	4.14465	122.911	120.411	118.411
AH D155.8	155.8			2552.95	2410.32	4.71388	4.14465	122.847	120.347	118.347
AH D156.5	156.5			2567.8	2427.21	4.71388	4.14465	122.832	120.332	118.332
AH D164	164			2726.9	2608.16	4.71388	4.14465	122.673	120.173	118.173
AH D164.3	164.3			2733.27	2615.4	4.71388	4.14465	122.667	120.167	118.167
AH D164.7	164.7			2741.75	2625.05	4.71388	4.14465	122.658	120.158	118.158
AH D168	168			2811.76	2704.67	4.71388	4.14465	122.588	120.088	118.088
AH D168.2	168.2		base Ap8	2816	2709.5	13.408	17.4583	122.584	120.084	118.084
AH D172.5	172.5			2848.07	2734.13	13.408	17.4583	122.552	120.052	118.052
AH D173.5	173.5			2855.53	2739.86	13.408	17.4583	122.544	120.044	118.044
AH D174	174			2859.26	2742.72	13.408	17.4583	122.541	120.041	118.041
AH D203.7	203.7			3080.77	2912.84	13.408	17.4583	122.319	119.819	117.819
AH D204.1	204.1			3083.75	2915.13	13.408	17.4583	122.316	119.816	117.816
AH D212.5	212.5			3146.4	2963.25	13.408	17.4583	122.254	119.754	117.754
AH D216	216			3172.5	2983.29	13.408	17.4583	122.227	119.727	117.727
AH D216.4	216.4			3175.49	2985.59	13.408	17.4583	122.225	119.725	117.725
AH D231	231			3284.38	3069.21	13.408	17.4583	122.116	119.616	117.616
AH D232.5	232.5			3295.56	3077.81	13.408	17.4583	122.104	119.604	117.604
AH D235	235			3314.21	3092.13	13.408	17.4583	122.086	119.586	117.586
AH D249	249			3418.63	3172.32	13.408	17.4583	121.981	119.481	117.481
AH D249.5	249.5			3422.35	3175.18	13.408	17.4583	121.978	119.478	117.478
AH D252	252		base Ap9	3441	3189.5	13.408	17.4583	121.959	119.459	117.459
AH D273	273			3597.62	3309.79	13.408	3.21839	121.802	119.302	117.302
AH D273.5	273.5			3601.35	3312.65	13.408	3.21839	121.799	119.299	117.299
AH D275	275			3612.54	3321.24	13.408	3.21839	121.787	119.287	117.287
AH D278	278	base of condensed section/ top of Walker Island Member		3634.91	3338.43	13.408	3.21839	121.765	119.265	117.265
AH D278.6	278.6
AH D280.5	280.5
AH D281.5	281.5
AH D292	292	base of Christopher Formation/ Invincible Point Member
AH D292.5	292.5
AH D293.5	293.5
AH D294.5	294.5
AH D295.2	295.2
AH D296.5	296.5
AH D297.5	297.5
AH D299	299
AH D300	300

## Sheet: Geochemical data
Sample information		Geochemical data					Ratios
sample ID	meterage	δ13Corg (‰ VPDB)	TOC (%)	S (%)	Al (%)	Zr (ppm)	S/TOC	Zr/Al
AH D0	0	-23.9108	8.17166	0.100949	10.8243	238.833	0.0123536	22.0644
AH D0.3	0.3	-23.8438	8.14118	0.0676829	10.4828	224.945	0.00831365	21.4585
AH D0.6	0.6	-23.9042	8.73984	0.0816649	10.649	218.084	0.00934398	20.4792
AH D0.9	0.9	-23.8565	7.55912	0.0783938	10.2772	242.082	0.0103707	23.5553
AH D1.5	1.5	-23.8631	6.74576	0.101537	9.7155	221.151	0.0150519	22.7627
AH D1.8	1.8	-23.9327	7.20886	0.0879188	10.041	255.294	0.0121959	25.4252
AH D2.1	2.1	-23.8834	6.36582	0.0794356	8.77752	249.512	0.0124785	28.4263
AH D2.4	2.4	-23.9062	8.2677	0.0674216	9.83567	254.145	0.00815482	25.8391
AH D2.7	2.7	-23.8727	6.90656	0.0817918	10.6879	235.399	0.0118426	22.0248
AH D3.1	3.1	-23.8844	7.50819	0.0532521	10.4195	242.09	0.00709254	23.2343
AH D3.4	3.4	-23.9443	8.49914	0.0894073	9.85152	242.489	0.0105196	24.6143
AH D3.7	3.7	-23.8808	7.26913	0.0581824	9.335	245.316	0.00800404	26.2792
AH D4	4	-23.9555	8.23376	0.102738	9.65261	264.502	0.0124777	27.4021
AH D4.3	4.3	-23.9443	8.66558	0.0525318	9.70097	244.486	0.00606211	25.2022
AH D4.9	4.9	-24.0097	6.91869	0.0553607	9.45382	319.775	0.00800162	33.825
AH D5.2	5.2	-23.9469	5.59333	0.0398015	8.43497	304.714	0.00711589	36.1251
AH D6	6	-23.9351	6.93237	0.0491976	9.52492	325.388	0.0070968	34.1618
AH D6.7	6.7	-23.8728	4.74261	0.0250873	8.68794	399.96	0.00528977	46.0362
AH D9.6	9.6	-23.7317	1.0113	0.00865787	6.80891	341.839	0.00856111	50.2047
AH D10	10	-23.7608	1.18399	0.0369437	6.27455	301.924	0.0312026	48.1188
AH D10.5	10.5	-23.9509	8.34173	0.0600188	10.7517	250.717	0.007195	23.3188
AH D11	11	-23.4901	5.12671	0.0634434	10.0137	306.831	0.0123751	30.6411
AH D11.3	11.3	-23.6434	4.69177	0.051808	8.42958	195.009	0.0110423	23.1338
AH D11.9	11.9	-23.6863	2.35983	0.0440882	7.63728	302.745	0.0186828	39.6404
AH D12.5	12.5	-23.6868	7.90749	0.100894	9.14303	300.103	0.0127593	32.8232
AH D13.1	13.1	-23.8551	4.14823	0.0545712	9.30021	379.21	0.0131553	40.7743
AH D13.4	13.4	-23.753	3.10877	0	8.34479	416.174	0	49.8724
AH D16	16	-23.7333	1.25914	0	10.0922	500.11	0	49.554
AH D16.5	16.5	-23.7858	1.08925	0	9.01057	457.047	0	50.7234
AH D16.6	16.6	-23.7113	2.63022	0.00121024	9.51337	532.343	0.000460128	55.9574
AH D16.8	16.8	-23.8593	2.12495	0	9.38632	595.087	0	63.3995
AH D26	26	-24.2723	3.98268	0.0119768	10.9614	306.116	0.00300723	27.9268
AH D26.3	26.3	-24.5041	3.40144	0.0173157	12.394	303.888	0.00509071	24.519
AH D26.6	26.6	-24.6389	2.5678	0	9.5202	179.416	0	18.8459
AH D27	27	-24.7262	2.19861	0.0291102	11.1298	275.489	0.0132403	24.7523
AH D27.5	27.5	-24.3744	3.27458	0	11.4049	314.753	0	27.5981
AH D27.8	27.8	-24.8164	2.05881	0	12.615	288.96	0	22.906
AH D34.6	34.6	-26.1096	2.73512	0.0319534	9.05038	541.743	0.0116826	59.8586
AH D34.9	34.9	-26.2857	4.52684	0.0649156	10.1052	354.507	0.0143402	35.0816
AH D35.1	35.1	-26.2377	4.61336	0.0951982	9.5788	331.543	0.0206353	34.6122
AH D35.4	35.4	-26.3071	4.65637	0.162168	10.0038	278.621	0.0348271	27.8516
AH D35.7	35.7	-26.0102	4.03036	0.377504	10.9572	297.173	0.093665	27.1212
AH D36	36	-26.1852	2.36563	0.0956977	10.2498	285.182	0.0404533	27.8233
AH D36.3	36.3	-26.2421	2.72462	0.228287	10.4873	254.149	0.0837869	24.234
AH D36.6	36.6	-26.2254	2.79279	0.223754	11.3996	279.213	0.0801183	24.4932
AH D36.9	36.9	-26.3173	1.75702	0.133096	10.8576	187.328	0.075751	17.2532
AH D37.2	37.2	-26.5142	1.5395	0.138165	10.0996	139.127	0.0897465	13.7754
AH D37.4	37.4	-26.7091	1.59989	0.161181	12.798	236.605	0.100745	18.4877
AH D37.5	37.5	-26.2445	1.31592	0.0194937	13.7017	166.432	0.0148138	12.1468
AH D46.7	46.7	-27.1433	2.41229	0.429315	10.9293	206.273	0.17797	18.8734
AH D47	47	-27.2259	2.86887	0.366202	11.7145	202.821	0.127647	17.3136
AH D52.1	52.1	-27.8117	3.0288	0.888016	10.716	233.317	0.293191	21.7727
AH D52.4	52.4	-28.0953	2.55873	1.05535	9.9018	228.106	0.41245	23.0369
AH D52.9	52.9	-27.8984	2.33995	0.748318	8.43881	277.438	0.319801	32.8764
AH D54	54	-27.8951	2.95146	0.979844	10.9112	210.731	0.331986	19.3132
AH D54.3	54.3	-27.9811	2.88459	1.1066	10.3952	263.195	0.383624	25.3189
AH D54.6	54.6	-27.9197	2.17304	0.893404	10.8826	185.924	0.411131	17.0845
AH D54.9	54.9	-28.0271	2.72474	1.00655	10.7803	240.884	0.369411	22.3449
AH D55.4	55.4	-27.9401	2.3934	0.98656	10.4453	203.352	0.412201	19.4682
AH D55.8	55.8	-27.9084	2.04363	0.935673	10.8195	227.672	0.457848	21.0427
AH D56.1	56.1	-27.7815	2.73607	1.18638	13.262	220.75	0.433607	16.6453
AH D56.8	56.8	-27.7493	2.67815	0.809592	9.59382	298.565	0.302295	31.1205
AH D57.1	57.1	-27.7549	2.48548	0.798031	11.5149	266.536	0.321076	23.147
AH D57.4	57.4	-27.6019	2.48151	1.36454	9.55058	293.249	0.549883	30.7049
AH D57.7	57.7	-27.4248	2.80174	0.848822	10.9451	300.717	0.302963	27.4749
AH D59.5	59.5	-27.5784	3.19218	1.60864	10.2542	248.252	0.50393	24.2098
AH D60.5	60.5	-26.2044	3.18833	0.231948	12.6449	278.898	0.0727488	22.0562
AH D61	61	-27.5599	3.11939	0.938338	10.7602	276.405	0.300808	25.6877
AH D62	62	-27.4591	1.01167	0.274428	5.56503	59.7204	0.271263	10.7314
AH D63	63	-28.0425	1.34598	0.375123	10.8929	200.79	0.278699	18.4332
AH D64	64	-27.7063	2.43085	0.851925	11.1262	286.996	0.350464	25.7946
AH D64.5	64.5	-27.6797	3.06265	0.798243	12.2715	239.866	0.260638	19.5466
AH D65	65	-27.4003	2.79053	0.938612	10.9794	246.182	0.336356	22.4221
Ah D65.5	65.5	-26.5181	2.26573	0.942818	10.675	324.663	0.41612	30.4133
Ah D74	74	-23.8311	2.15786	0.0984516	9.22314	454.574	0.0456246	49.2863
AH D74.3	74.3	-24.0117	1.47509	0.278331	8.67156	410.255	0.188688	47.3104
AH D74.8	74.8	-24.2538	3.58732	0.467529	12.8558	402.12	0.130328	31.2792
AH D75.5	75.5	-24.1417	1.7393	0.0997809	10.028	585.561	0.0573685	58.3929
AH D75.8	75.8	-23.9842	4.38134	0.133213	13.2136	468.374	0.0304046	35.4464
AH D76.4	76.4	-24.0235	4.14268	0.0774672	11.8635	572.926	0.0186998	48.2933
AH D77.5	77.5	-23.7791	4.51191	0.0892519	13.9742	621.77	0.0197814	44.494
AH D78.2	78.2	-24.0424	5.55854	0.124764	12.2502	390.66	0.0224455	31.8902
AH D81	81	-23.7361	5.23438	0.0926991	16.394	398.008	0.0177097	24.2777
AH D81.7	81.7	-23.5917	5.17135	0.0818246	15.6546	454.38	0.0158227	29.0254
AH D82.3	82.3	-23.4219	4.40903	0.105886	13.0568	419.344	0.0240157	32.117
AH D83.5	83.5	-23.702	3.74348	0.0893048	11.7122	304.083	0.0238561	25.963
AH D84.9	84.9	-23.4463	4.62635	0.0840266	14.0921	388.211	0.0181626	27.5482
AH D86	86	-23.4387	4.13789	0.0511401	12.7876	288.837	0.012359	22.5872
AH D86.2	86.2	-23.3721	4.39159	0.0680365	11.3036	207.213	0.0154925	18.3316
AH D86.5	86.5	-23.6878	4.02267	0.196487	11.6671	444.28	0.0488449	38.0796
AH D87.7	87.7	-23.64	3.11233	0.425106	11.7074	384.864	0.136588	32.8736
AH D88.5	88.5	-23.5621	2.735	0.682676	12.0597	439.137	0.249608	36.4136
AH D89.7	89.7	-23.6629	2.90091	0.14841	11.1349	347.968	0.0511599	31.2503
AH D90.1	90.1	-23.7622	3.07281	0.257715	11.343	552.331	0.0838695	48.6933
AH D91	91	-23.727	2.771	0.138482	12.4703	423.618	0.0499755	33.9702
AH D96.8	96.8	-22.8692	5.36441	0.88224	12.1919	203.876	0.164462	16.7223
Ah D98	98	-22.3926	6.02429	1.8363	11.8826	193.807	0.304817	16.3101
AH D98.3	98.3	-22.1247	5.87958	1.16981	12.6958	216.276	0.198961	17.0352
AH D98.7	98.7	-22.0602	6.17189	1.82931	11.7377	213.219	0.296393	18.1654
AH D99.1	99.1	-22.2284	7.58884	1.60735	12.8098	237.742	0.211804	18.5595
AH D99.6	99.6	-22.0917	6.6399	2.69133	12.3633	148.416	0.405327	12.0045
AH D100	100	-21.8868	7.50985	2.63429	11.697	161.699	0.350778	13.824
AH D101.7	101.7	-21.9062	8.05215	2.09226	11.9898	210.049	0.259839	17.519
AH D102	102	-21.99	6.61225	0.977927	12.4278	189.754	0.147896	15.2685
AH D102.3	102.3	-21.7105	8.39262	0.114935	12.9488	179.874	0.0136947	13.8912
AH D102.7	102.7	-21.7618	4.87895	0.849829	12.8969	259.516	0.174183	20.1224
AH D110.4	110.4	-21.9842	4.09975	0.0897722	12.4231	378.731	0.021897	30.486
AH D114	114	-21.9898	3.56773	0.0697886	12.9704	631.669	0.0195611	48.7009
AH D115	115	-21.8497	7.46026	0.863064	12.859	143.569	0.115688	11.1648
AH D115.5	115.5	-21.9036	7.27244	0.0722097	10.6634	199.036	0.00992923	18.6653
AH D117.5	117.5	-22.1832	4.13625	0.111661	9.79918	335.535	0.0269958	34.2411
AH D122.6	122.6	-22.0687	2.38097	0.0462381	11.9892	433.49	0.0194199	36.1566
AH D123.1	123.1	-22.0005	3.41401	0.0595289	8.73288	403.288	0.0174366	46.1804
AH D123.7	123.7	-22.0137	3.23912	0.0448043	8.96825	396.156	0.0138322	44.1731
AH D124	124	-21.9995	3.60823	0.0596286	12.4671	571.821	0.0165257	45.8666
AH D128	128	-22.4007	2.11417	0.0354073	8.90129	443.011	0.0167476	49.7693
AH D130.4	130.4	-22.3274	3.03559	0.0825465	10.4908	411.265	0.0271929	39.2023
AH D147.5	147.5	-22.2821	1.51601	0.0251593	9.37527	407.768	0.0165957	43.494
AH D147.8	147.8	-22.3294	0.9731	0.0146608	6.68538	299.069	0.0150661	44.7347
AH D148	148	-22.2821	1.31146	0.0236035	11.7488	485.768	0.0179979	41.3464
AH D148.5	148.5	-22.2581	1.7904	0.0315434	10.1203	495.859	0.0176181	48.9965
AH D149	149	-21.9844	4.15488	0.0509261	12.2267	413.659	0.0122569	33.8324
AH D149.0-2	149	-21.9844	4.15488	0.0509261	12.2267	413.659	0.0122569	33.8324
AH D149.4	149.4	-22.082	2.53694	0.0453392	11.6047	745.714	0.0178716	64.2597
AH D149.5	149.5	-21.9623	2.14977	0.0345452	10.0167	670.686	0.0160693	66.9568
AH D149.6	149.6	-22.0947	0.83822	0.0208326	11.1469	544.61	0.0248534	48.8576
AH D149.9	149.9	-21.7903	2.01302	0.0412376	9.92	585.456	0.0204854	59.0177
AH D151	151	-21.4929	1.68613	0.0348763	9.42795	532.583	0.0206843	56.4898
AH D152	152	-21.8183	0.756571	0.0310141	8.45234	715.119	0.040993	84.6061
AH D152.8	152.8	-21.5566	0.947163	0.023447	9.76167	915.024	0.024755	93.7364
AH D155.8	155.8	-21.5661	7.13466	0.0590225	9.36869	354.326	0.00827265	37.8202
AH D156.5	156.5	-21.6047	6.21707	0.0529698	10.4609	229.395	0.00852005	21.9287
AH D164	164	-21.988	3.96769	0.125898	10.9602	520.339	0.0317307	47.4753
AH D164.3	164.3	-22.3026	13.1657	0.218008	9.74021	847.523	0.0165587	87.0128
AH D164.7	164.7	-21.6601	3.59719	0.0218749	9.69704	403.864	0.00608109	41.6482
AH D168	168	-21.8401	9.02487	0.11874	12.034	433.07	0.0131569	35.9871
AH D168.2	168.2	-21.595	1.62107	0.0258934	7.38753	539.159	0.0159731	72.9823
AH D172.5	172.5	-21.8261	1.88224	0.028994	7.74937	567.93	0.0154039	73.2872
AH D173.5	173.5	-21.9184	1.70263	0.0275274	6.85122	592.843	0.0161676	86.5309
AH D174	174	-22.008	1.44798	0.0242824	7.50332	380.237	0.0167699	50.6758
AH D203.7	203.7	-22.5672	0.878603	0.017763	8.14238	856.909	0.0202173	105.241
AH D204.1	204.1	-22.1951	1.51449	0.0224374	9.14267	544.083	0.0148152	59.5102
AH D212.5	212.5	-22.4223	3.49373	0.0329381	14.8102	473.057	0.00942776	31.9412
AH D216	216	-22.4519	3.07391	0.0287485	11.845	489.75	0.00935241	41.3464
AH D216.4	216.4	-22.2354	1.13133	0.00844165	11.4658	542.486	0.00746172	47.3136
AH D231	231	-22.9402	1.48987	0.0105518	11.2404	522.263	0.00708235	46.4631
AH D232.5	232.5	-22.6455	1.77138	0.0213021	10.661	740.758	0.0120257	69.4832
AH D235	235	-22.9919	2.1726	0.0348959	12.093	901.482	0.0160618	74.5458
AH D249	249	-23.6043	3.54288	0.053601	12.5313	385.59	0.0151292	30.7701
AH D249.5	249.5	-23.5926	2.83499	0.15821	10.4508	379.907	0.0558061	36.3519
AH D252	252	-23.8453	2.7066	0.0285614	10.2888	373.942	0.0105525	36.3446
AH D273	273	-23.5783	4.22338	0.0901264	10.2189	508.94	0.0213399	49.8038
AH D273.5	273.5	-23.9222	2.46216	0.0808221	14.8786	482.97	0.0328257	32.4608
AH D275	275	-24.0221	5.73402	0.127458	19.9658	366.493	0.0222284	18.356
AH D278	278	-24.1499	3.08111	0.076798	16.7608	356.827	0.0249255	21.2894
AH D278.6	278.6	-24.0959	2.75645	0.0704673	14.9473	360.888	0.0255645	24.144
AH D280.5	280.5	-23.5675	6.34714	0.188114	17.6735	334.078	0.0296376	18.9028
AH D281.5	281.5	-23.3873	2.63343	7.09568	15.8437	126.942	2.69447	8.01214
AH D292	292	-23.3042	5.87362	0.524852	16.995	162.511	0.0893575	9.56225
AH D292.5	292.5	-23.4805	4.78427	2.54396	15.0532	187.669	0.531735	12.4671
AH D293.5	293.5	-24.367	2.77632	2.20647	15.7853	190.012	0.794747	12.0373
AH D294.5	294.5	-24.1239	4.86815	0.151052	17.1183	362.14	0.0310287	21.1551
AH D295.2	295.2	-24.0995	5.11146	0.0809583	16.2771	144.588	0.0158386	8.88293
AH D296.5	296.5	-24.1795	2.55816	0.436298	14.8808	293.636	0.170552	19.7325
AH D297.5	297.5	-23.8397	4.87955	0.0879552	12.177	163.693	0.0180253	13.4428
AH D299	299	-24.0159	5.61539	0.107172	16.1897	235.594	0.0190854	14.5521
AH D300	300	-23.7057	4.48144	0.0546084	9.26487	153.878	0.0121855	16.6088
